# Increasing Prevalence of Metabolic Syndrome in a Chinese Elderly Population: 2001–2010

Miao Liu<sup>1,2,9</sup>, Jianhua Wang<sup>1,2,9</sup>, Bin Jiang<sup>3</sup>, Dongling Sun<sup>1</sup>, Lei Wu<sup>1,2</sup>, Shanshan Yang<sup>1,2</sup>, Yiyan Wang<sup>1,2</sup>, Xiaoying Li<sup>4</sup>, Yao He<sup>1,2,5\*</sup>

**1** Institute of Geriatrics, Chinese PLA General Hospital, Beijing, China, **2** Beijing Key Laboratory of Aging and Geriatrics, Chinese PLA General Hospital, Beijing, China, **3** Department of Chinese Traditional Medicine and Acupuncture, Chinese PLA General Hospital, Beijing, China, **4** Department of Geriatric Cardiology, Chinese PLA General Hospital, Beijing, China, **5** State Key Laboratory of Kidney Disease, Chinese PLA General Hospital, Beijing, China

## Abstract

**Objective:** The information on the changes of prevalence of MetS in China is limited. Our objective was to assess a 10-year change of the prevalence of MetS in a Chinese elderly population between 2001 and 2010.

**Methods:** We conducted two cross-sectional surveys in a representative sample of elderly population aged 60 to 95 years in Beijing in 2001 and 2010 respectively. MetS was defined according to the 2009 harmonizing definition.

**Results:** A total of 2,334 participants (943 male, 1,391 female) in 2001 and 2,102 participants (848 male, 1,254 female) in 2010 completed the survey. The prevalence of MetS was 50.4% (95%CI: 48.4%–52.4%) in 2001 and 58.1% (95%CI: 56.0%–60.2%) in 2010. The absolute change of prevalence of MetS was 7.7% over the 10-year's period ( $p < 0.001$ ). The syndrome was more common in female than male in both survey years. Among the five components, hypertriglyceridemia and low HDL-C had increased most, with an increase of 14.8% (from 29.4% to 44.2%) and 9.9% (from 28.3% to 38.2%) respectively. The adjusted ORs of MetS for CHD, stroke and CVD were 1.67(95%CI: 1.39–1.99), 1.50(95%CI: 1.19–1.88) and 1.70(95%CI: 1.43–2.01) respectively in 2001, and were 1.74(95%CI: 1.40–2.17), 1.25(95%CI: 0.95–1.63) and 1.52(95%CI: 1.25–1.86) respectively in 2010.

**Conclusion:** The prevalence of MetS is high and increasing rapidly in this Chinese elderly population. Participants with MetS and its individual components are at significantly elevated ORs for CVD. Urgent public health actions are needed to control MetS and its components, especially for dyslipidemia.

**Citation:** Liu M, Wang J, Jiang B, Sun D, Wu L, et al. (2013) Increasing Prevalence of Metabolic Syndrome in a Chinese Elderly Population: 2001–2010. PLoS ONE 8(6): e66233. doi:10.1371/journal.pone.0066233

**Editor:** Stefan Kiechl, Innsbruck Medical University, Austria

**Received:** February 19, 2013; **Accepted:** May 2, 2013; **Published:** June 18, 2013

**Copyright:** © 2013 Liu et al. This is an open-access article distributed under the terms of the Creative Commons Attribution License, which permits unrestricted use, distribution, and reproduction in any medium, provided the original author and source are credited.

**Funding:** This study is supported by research grants from the National Natural Science Foundation of China (81072355), Beijing Municipal Science and Technology Commission (D121100004912003) and National Public Benefit Research Foundation by the Ministry of Health of China (201002011). The funders had no role in study design, data collection and analysis, decision to publish, or preparation of the manuscript.

**Competing Interests:** The authors have declared that no competing interests exist.

\* E-mail: yhe301@sina.com

<sup>9</sup> These authors contributed equally to this work.

## Introduction

The metabolic syndrome (MetS) is a complex of interrelated risk factors for cardiovascular disease (CVD) and diabetes, resulting from obesity and insulin resistance. These factors include hyperglycemia, elevated blood pressure, hypertriglyceridemia, decreased high density-lipoprotein cholesterol (HDL-C) and obesity (particularly central adiposity). Currently available evidence suggests that MetS is associated with the development of type 2 diabetes, cardiovascular disease and an increased risk for mortality from cardiovascular disease and all causes [1–4].

Several studies have published information on the prevalence of MetS, however, only a few studies have reported changes of MetS, and the results were inconsistent [5–8]. The situation is similar in China, some studies have reported the prevalence of MetS in different groups [9–12], but little information exists about the change of MetS during the past decade in China, which has undergone a dramatic socioeconomic change and a succession of

unhealthy lifestyles. These changes have led to an increased burden in chronic diseases [9]. Therefore, it's urgent and important to examine changes of MetS in this rapid development and changing period in China. Our study aims to examine the prevalence and changes of MetS in an elderly population in Beijing using the 2009 harmonizing definition [13].

## Research Design and Methods

### Methods

Sampling and research methods were reported elsewhere [14]. In brief, a two-stage stratified clustering sampling method was used to conduct this population-based cross-sectional survey in participants aged  $\geq 60$  years living in Wanshoulu district, a representative urban residential area of Beijing. In 2001, a total of 2,680 participants aged 60–95 years were selected and 2,334 participants completed the survey with a response rate of 87.3%. These

participants accounted for about 10% of total elderly residents in the Wanshoulu district. In 2010, we did another cross-sectional survey in the same district using the same method. A total of 2,162 participants were selected this time and 2,102 participants completed the survey. Because of the rapid socioeconomic change and huge personnel flow in China, there are only 774 participants (35%) included in both survey times.

Each participant was interviewed and completed a standardized questionnaire including a range of demographic factors, medical history, family history of CVD, and lifestyles. Specially trained nurses and observers measured the height, weight, waist and blood pressure according to the standardized protocol. Height was measured in meters (without shoes), and weight was measured in kilograms (with heavy clothing removed and 1 kg deducted for remaining garments). Body mass index (BMI) was calculated as weight in kilograms divided by the square of height in meters. Waist circumference on standing participants was measured midway between the lower rib margin and iliac crest. Two blood pressure recordings were obtained from the right arm of participants in a sitting position after 30 min of rest, and mean values were calculated. Overnight fasting blood specimens were obtained for measurement of serum lipids and glucose. Samples were sent to the central certified laboratory of Chinese PLA general hospital in less than 30 minutes.

### Definition of MetS

The 2009 harmonizing definition was used, as the presence of at least three of the following five risk factors: (1) central obesity (waist circumference  $\geq 90$  cm in Asian men and  $\geq 80$  cm in Asian women); (2) decreased HDL-C: fasting HDL-C  $< 1.0$  mmol/L in men and  $< 1.3$  mmol/L in women, drug treatment for reduced HDL-C is an alternate indicator; (3) elevated blood pressure: systolic  $\geq 130$  mmHg and/or diastolic  $\geq 85$  mmHg, antihypertensive drug treatment in a patient with a history of hypertension is an alternate indicator; (4) hypertriglyceridemia: fasting plasma triglycerides  $\geq 1.7$  mmol/L, drug treatment for elevated triglycerides is an alternate indicator; (5) hyperglycemia: fasting glucose level of  $\geq 5.6$  mmol/L ( $\geq 100$  mg/dL), drug treatment of elevated glucose is an alternate indicator [13].

### Diagnosis of CVD and Diabetes

Coronary heart diseases (CHD) and stroke were defined using the WHO MONICA criteria [15]. CVD in this study was defined as having at least one of the two events. The diagnosis of CVD was based on self report and confirmed by medical records and clinical examination carried out during the survey time including electrocardiogram. Participants with fasting plasma glucose  $\geq 7.0$  mmol/l or 2-h plasma glucose  $\geq 11.1$  mmol/l after oral glucose tolerance test or those who were receiving anti-diabetic medications were diagnosed with diabetes mellitus.

### Statistical Analysis

Data were entered (double entry) using Epidata 3.1. All analyses were conducted using SPSS (18.0, No. of Serial: 5076595). Reported probabilities were two-sided, with  $p < 0.05$  considered to be statistically significant.

Gender-specific prevalence of MetS was calculated using the 2009 harmonizing definition. Direct age adjustment of the data was done for participants surveyed at 2010, using the data of 2001 as reference. T test and  $\chi^2$  test were used to examine differences in continuous and categorical variables, and compare the prevalence of MetS and its components by years and gender. We also did a longitudinal analysis for those who were included in both two

survey times. Logistic regression was used to calculate the odds ratios (ORs) and 95% confidence intervals (CIs) for MetS.

### Ethical Considerations

The study was approved by the committee for medical ethics of the Chinese PLA General Hospital. Each participant signed an informed consent before completing the questionnaire.

### Results

A total of 2,334 participants (943 male, 1,391 female) in 2001 and 2,102 participants (848 male, 1,254 female) in 2010 completed the survey. We calculated the age-adjusted value for continuous data in 2010, using 2001 as reference. General characteristics were listed in Table 1.

### Prevalence and Changes of MetS

Table 2 showed the proportion of Chinese elderly people with MetS and individual components. The prevalence of MetS was 50.4% (95%CI: 48.4%–52.4%) in 2001 and 58.1% (95%CI: 56.0%–60.2%) in 2010 (Table 2). In both surveys, we found a higher prevalence of MetS in female than in male ( $P < 0.001$ ).

In the 10-year's period, the prevalence of MetS increased significantly ( $p < 0.001$ ), from 50.4% to 58.1%. Male had a greater increase than female, with an absolute increase of 10.0% and 5.6% respectively.

### Prevalence and Changes of Individual Components of MetS

Table 2 also demonstrated the prevalence of each component of MetS. The most common component for both male and female in both surveys was elevated blood pressure, which involved about three fourths of all the participants. Hypertriglyceridemia and low HDL-C were relatively low. There were different ranks in the five components for male and female. For male, elevated blood pressure was the highest, with central obesity and hyperglycemia followed next. While for female, central obesity and elevated blood pressure ranked first, with hyperglycemia coming third.

From 2001 to 2010, there was a dramatic increase in the prevalence of hypertriglyceridemia and low HDL-C, especially in male. Hypertriglyceridemia had an absolute increase of prevalence of 14.8%, followed by HDL-C with an absolute change of 9.9%. The increase of prevalence of elevated blood pressure was 4.0%, with 2.3% in male and 5.0% in female. The component of central obesity showed a significant increase in male (5.8%,  $p = 0.015$ ) while remained unchangeable in female ( $-0.4%$ ,  $p = 0.799$ ). Hyperglycemia was the only component that had decreased ( $-0.3%$ ,  $p = 0.212$ ) during the period.

The number of components of MetS changed remarkably from 2001 to 2010. For example, individuals who had at least four of the five components of MetS increased from 23.6% to 34.2% ( $p < 0.001$ ) (Table 2).

### Longitudinal Analysis of MetS for the 774 Participants Included in Both Two Survey Times

Table 3 showed the prevalence of MetS for those participants included in both two survey times. The results are similar to those showed in Table 2. The prevalence of MetS has increased from 49.2% (95%CI: 45.7%–52.8%) to 58.8% (95%CI: 55.2%–61.7%) in the 10-year's period. Female have a higher prevalence in both two survey times, but male have a greater increase (an absolute change of 12.7% for male and 8.4% for female). Of the five

**Table 1.** General Characteristics in the Participants of Two Surveys at 2001 and 2010.

| Characteristic                  | 2001<br>(n = 2334) | 2010<br>(n = 2102) | P      |
|---------------------------------|--------------------|--------------------|--------|
| Mean age (yrs)                  | 67.6(6.0)          | 71.2(6.6)          | <0.001 |
| Age-adjusted mean(SD)           |                    |                    |        |
| Waist circumference(cm)         | 87.6(9.4)          | 87.8(8.9)          | 0.420  |
| BMI(kg/m <sup>2</sup> )         | 25.6(3.5)          | 25.0(3.4)          | <0.001 |
| Systolic blood pressure (mm Hg) | 136.9(21.2)        | 137.1(19.2)        | 0.766  |
| Diastolic blood pressure(mmHg)  | 77.1(10.4)         | 77.5 (9.7)         | 0.256  |
| Fasting glucose(mmol/L)         | 6.1 (1.9)          | 6.0 (1.6)          | 0.103  |
| Total cholesterol(mmol/L)       | 5.3(1.7)           | 5.3(1.0)           | 0.374  |
| Triglycerides(mmol/L)           | 1.6(1.1)           | 1.7(1.0)           | <0.001 |
| HDL-C(mmol/L)                   | 1.4(0.4)           | 1.4(0.4)           | 0.109  |
| LDL-C(mmol/L)                   | 3.3(1.0)           | 3.3(0.8)           | 0.846  |
| Number (%)                      |                    |                    |        |
| Gender                          |                    |                    | 0.967  |
| Male                            | 943(40.4)          | 848(40.3)          |        |
| Female                          | 1391(59.6)         | 1254(59.7)         |        |
| Education (yrs)                 |                    |                    | <0.001 |
| 0–6                             | 967(41.4)          | 580(27.6)          |        |
| 7–12                            | 832(35.6)          | 849(40.4)          |        |
| ≥13                             | 535(22.9)          | 673(32.0)          |        |
| Marital status                  |                    |                    | 0.141  |
| Married                         | 1967(84.3)         | 1774(84.4)         |        |
| Single or divorced              | 11(0.5)            | 20(1.0)            |        |
| Widowed                         | 356(15.3)          | 308(14.7)          |        |
| Physical exercise (h/day)       |                    |                    | <0.001 |
| <1                              | 615(26.3)          | 298(14.2)          |        |
| 1–3                             | 900(38.6)          | 1607(76.5)         |        |
| ≥4                              | 819(35.1)          | 197(9.4)           |        |
| Smoking status                  |                    |                    | <0.001 |
| Never                           | 1606(68.8)         | 1531(72.8)         |        |
| Former                          | 375(16.1)          | 340(16.2)          |        |
| Current                         | 353(15.1)          | 231(11.0)          |        |
| Current alcohol drinking        | 354(15.2)          | 506(24.1)          | <0.001 |
| Family histories of CVD         | 1180(50.6)         | 1308(62.2)         | <0.001 |
| CHD                             | 784(33.6)          | 438(23.7)          | <0.001 |
| Stroke                          | 378(16.2)          | 267(12.7)          | <0.001 |
| CVD                             | 995(42.6)          | 665(31.6)          | <0.001 |

Data are mean (SD) for continuous values or n (%) for category values;  
LDL-C: low density-lipoprotein cholesterol.  
doi:10.1371/journal.pone.0066233.t001

components, hypertriglyceridemia and low HDL-C have increased most, which are 8.9% and 8.1% respectively.

### ORs of MetS and CVD

Table 4 showed the ORs for MetS and its individual components associated with CHD and stroke. The ORs of MetS for CHD, stroke and CVD were 1.67(95%CI: 1.39–1.99), 1.50(95%CI: 1.19–1.88) and 1.70(95%CI: 1.43–2.01) in 2001, and were 1.74(95%CI: 1.40–2.17), 1.25(95%CI: 0.95–1.63) and 1.52(95%CI: 1.25–1.86) respectively in 2010. Of the five

components, the ORs of elevated blood pressure and central obesity for CVD were higher than those of the other three in 2001, which were 1.88(95%CI: 1.54–2.29) and 1.48(95%CI: 1.23–1.77). In 2010, the ORs of low HDL-C increased to 1.83 (95%CI: 1.51–2.22), which were almost the same as elevated blood pressure and higher than the other three components. The ORs of hypertriglyceridemia for CVD also increased from 1.19(95%CI: 0.99–1.43) to 1.42(95%CI: 1.17–1.71) at 2001 and 2010.

We also ascertained the association of MetS and CVD in the sensitivity analysis and the results were similar (Table S1). When diabetic patients (n = 362, 15.5% in 2001 and n = 652, 31.0% in 2010) were excluded, the ORs for MetS associated with CVD changed but still remained significant. The adjusted ORs for MetS associated with CVD were 1.54(95%CI: 1.27–1.85) in 2001 and 1.29(95%CI: 1.02–1.63) in 2010.

### Discussion

To the best of our knowledge, this is the first study to assess the changes of prevalence of MetS in the past decade of China. It indicated that, in this Chinese elderly population, the prevalence of MetS increased significantly from 2001 to 2010, based on the 2009 harmonizing definition (absolute change 7.7%, p<0.001).

Only a few studies examined the trends of the prevalence of MetS, and the results were inconsistent, some were decreased or remained unchanged, some studies showed an increase trend but with different annual increase rate. In Korea, the prevalence of MetS increased 6.4% from 1998 to 2007 for people aged ≥20 years [6]; in Finland, the prevalence increased significantly among female (6.9%) but remained unchanged among male [7]; in US, the age-adjusted prevalence of MetS increased from 29.2% to 34.2% from National Health and Nutrition Examination Survey (NHANES)III to NHANES in 1999–2006 [8]; in Mexico, the prevalence for male stayed unchangeable between 1990–1992 and 1997–1999, but in female, the prevalence decreased from 65.4% to 59.9% [5]. Here in our study, we found an enormous increase in the prevalence of MetS among Chinese elderly. China has experienced fast economic development. As China increases its rate of modernization and becomes more urbanized, more people are likely to have sedentary lifestyles and consumption of energy-dense diets [9]. These changes are associated with lifestyle-related abnormal biochemical indexes, such as large waist circumference, dyslipidemia, elevated blood pressure and hyperglycemia, and eventually causing increase in the prevalence of MetS, and this will bring an increase in diabetes and CVD and related social-economic disease burden [16,17].

Most of the five components of MetS have increased in the 10-years' period, while hyperglycemia and low HDL-C increased most, with an absolute change of 14.8% and 9.9% respectively. The results from the longitudinal studies also confirmed the big increase in these two components. And this finding is also consistent with other studies in China. Previous studies and efforts had paid lots of attention on hypertension and diabetes while less on dyslipidemia. However, with the changes of the enormous social-demographic status, lifestyles had big transition, and Chinese people now consume more meat and fat than before. Data from the Chinese National Nutrition Survey have showed the proportion of dietary energy derived from fat increased dramatically from 19% to 28%, and the adults' consumption of animal meat increased enormously while cereals and starchy roots declined significantly between 1991 and 2004 [16,17]. These unhealthy lifestyles contributed to significant increase in serum cholesterol and also explained the recent rapid increase in chronic diseases in China to some extent [18]. Although the prevalence of

**Table 2.** Age-adjusted and Gender-specific Prevalence of MetS in the Participants of Two Surveys at 2001 and 2010.

|                                     | Male            |                 |        | Female          |                 |        | Total           |                 |        |
|-------------------------------------|-----------------|-----------------|--------|-----------------|-----------------|--------|-----------------|-----------------|--------|
|                                     | 2001            | 2010            | P      | 2001            | 2010            | P      | 2001            | 2010            | P      |
| <b>MetS components</b>              |                 |                 |        |                 |                 |        |                 |                 |        |
| Elevated blood pressure             | 73.6(70.8–76.4) | 75.9(72.9–78.9) | 0.275  | 73.3(71.0–75.7) | 78.3(76.0–80.5) | 0.003  | 73.4(71.6–75.2) | 77.4(75.6–79.2) | 0.003  |
| Central obesity                     | 52.1(48.9–55.3) | 57.9(54.5–61.4) | 0.015  | 77.5(75.3–79.7) | 77.1(74.8–79.4) | 0.799  | 67.2(65.3–69.1) | 69.8(67.9–71.8) | 0.063  |
| Hyperglycemia                       | 52.3(49.1–55.5) | 53.0(49.5–54.5) | 0.760  | 52.5(49.9–55.1) | 49.0(46.3–51.7) | 0.074  | 52.4(50.4–54.4) | 52.1(50.0–54.2) | 0.212  |
| Hypertriglyceridemia                | 22.6(19.9–25.3) | 38.9(35.5–42.3) | <0.001 | 34.1(31.6–36.6) | 47.4(44.7–50.1) | <0.001 | 29.4(27.6–31.3) | 44.2(42.1–46.3) | <0.001 |
| Low HDL-C                           | 16.4(14.1–18.8) | 27.6(24.5–30.7) | <0.001 | 36.3(33.8–38.9) | 44.6(41.9–47.3) | <0.001 | 28.3(26.5–30.1) | 38.2(36.1–40.2) | <0.001 |
| <b>Number of components of MetS</b> |                 |                 |        |                 |                 |        |                 |                 |        |
| One or more                         | 90.2(88.4–92.1) | 92.8(91.0–94.6) | 0.054  | 95.2(94.1–96.3) | 94.7(93.5–95.9) | 0.577  | 93.2(92.2–94.2) | 94.0(93.0–95.0) | 0.269  |
| Two or more                         | 68.4(65.4–71.4) | 74.3(71.2–77.3) | 0.007  | 83.1(81.1–85.1) | 84.0(82.0–86.0) | 0.569  | 77.2(75.5–78.9) | 80.3(78.6–82.0) | 0.011  |
| Three or more (MetS)                | 40.6(37.5–43.7) | 50.6(47.1–54.0) | <0.001 | 57.0(54.4–59.6) | 62.6(60.1–65.3) | 0.003  | 50.4(48.4–52.4) | 58.1(56.0–60.2) | <0.001 |
| Four or more                        | 15.0(12.7–17.2) | 25.8(22.8–28.9) | <0.001 | 29.4(27.0–31.8) | 39.3(36.6–41.9) | <0.001 | 23.6(21.8–25.3) | 34.2(32.2–36.2) | <0.001 |
| Five                                | 2.8(1.7–3.8)    | 9.8(7.7–11.9)   | <0.001 | 9.1(7.5–10.6)   | 15.8(13.8–17.8) | <0.001 | 6.5(5.5–7.5)    | 13.5(12.1–15.0) | <0.001 |

doi:10.1371/journal.pone.0066233.t002

dislipidemia increases rapidly, it didn't get enough emphasis. A study showed the proportion of male and female in China who were aware, treated, and took control of dislipidemia was only 8.8% and 7.5%, 3.5% and 3.4%, 1.9% and 1.5%, respectively, much lower than those of hypertension and diabetes [19]. Dislipidemia is one of the most important modifiable risk factors for CVD. In order to reduce the large and increasing burden of CVD in China, we should develop more effective public health strategies for the prevention and treatment of dislipidemia, and it's an urgent priority to reduce serum cholesterol level and the related social and medical burden in China [20].

In our study, the prevalence of MetS was much higher in female than in male, which was consistent with other research [9]. However, male increased at a faster rate, which resulted in the fact that the gender difference is reducing over the past decade. This is

primarily attributable to a higher increase of central obesity and low HDL-C in male than female.

In our study, participants with MetS had significantly higher ORs of CHD, stroke and CVD. Of the five components, elevated blood pressure and central obesity not only had higher prevalence, but also had higher ORs for CVD. Hypertriglyceridemia and low HDL-C increased most in the 10-year's period and also had an increased OR for CVD. This finding indicates that it's important and meaningful to control both overall MetS and its individual components, so as to prevent related diabetes and CVD events.

This is a population-based cross-sectional study with strict training process and quality assurance programs. Wanshoulu District is a representative metropolitan area of the geographic and economic characteristics in Beijing, such as income levels, residential status, and lifestyle factors. The response rate was high

**Table 3.** Gender-specific Prevalence of MetS for Participants Included in Both Two Surveys.

|                                     | Male (n = 300)  |                 |                | Female (n = 474) |                 |                | Total (n = 774) |                 |                |
|-------------------------------------|-----------------|-----------------|----------------|------------------|-----------------|----------------|-----------------|-----------------|----------------|
|                                     | 2001            | 2010            | P <sup>△</sup> | 2001             | 2010            | P <sup>△</sup> | 2001            | 2010            | P <sup>△</sup> |
| <b>MetS components</b>              |                 |                 |                |                  |                 |                |                 |                 |                |
| Elevated blood pressure             | 71.0(65.8–76.2) | 76.3(71.8–80.8) | 0.006          | 72.2(68.1–76.2)  | 79.9(76.5–83.3) | 0.002          | 71.7(68.5–74.9) | 79.6(76.9–82.3) | 0.002          |
| Central obesity                     | 50.7(45.0–56.4) | 60.3(54.8–65.9) | 0.001          | 77.6(73.9–81.4)  | 80.8(77.2–84.4) | 0.137          | 67.2(63.9–70.5) | 72.9(69.7–76.0) | 0.001          |
| Hyperglycemia                       | 49.7(44.0–55.4) | 57.7(52.1–63.3) | 0.009          | 48.5(44.0–53.0)  | 51.5(47.0–56.0) | 0.239          | 49.0(45.4–52.5) | 53.9(50.4–57.3) | 0.009          |
| Hypertriglyceridemia                | 24.7(19.8–29.6) | 35.3(29.9–40.8) | 0.001          | 35.4(31.1–39.8)  | 49.8(45.3–54.3) | <0.001         | 31.3(28.0–34.5) | 44.2(40.7–47.7) | <0.001         |
| Low HDL-C                           | 14.3(10.4–18.3) | 26.0(21.0–31.0) | <0.001         | 37.8(33.4–42.1)  | 43.7(39.2–48.1) | 0.021          | 28.7(25.5–31.9) | 36.8(33.4–40.2) | <0.001         |
| <b>Number of components of MetS</b> |                 |                 |                |                  |                 |                |                 |                 |                |
| One or more                         | 90.7(87.4–94.0) | 94.7(92.1–97.2) | 0.050          | 94.5(92.5–96.6)  | 96.6(95.0–98.3) | 0.076          | 93.0(91.2–94.8) | 95.9(94.5–97.3) | 0.005          |
| Two or more                         | 67.7(62.7–73.0) | 78.0(73.3–82.7) | <0.001         | 82.3(78.8–85.7)  | 88.8(86.0–91.7) | 0.001          | 76.6(73.6–79.6) | 84.6(82.1–87.2) | <0.001         |
| Three or more (MetS)                | 38.0(32.4–43.5) | 50.7(45.0–56.3) | <0.001         | 56.3(51.9–60.8)  | 64.7(60.4–68.9) | <0.001         | 49.2(45.7–52.8) | 58.8(55.2–61.7) | <0.001         |
| Four or more                        | 12.3(8.6–16.1)  | 25.7(20.7–30.6) | <0.001         | 28.7(24.6–32.8)  | 41.4(36.9–45.8) | <0.001         | 22.4(19.4–25.3) | 35.3(31.9–38.6) | <0.001         |
| Five                                | 1.7(0.2–3.1)    | 10.7(7.2–14.2)  | <0.001         | 9.7(7.0–12.4)    | 15.2(12.0–18.4) | 0.003          | 6.6(4.8–8.3)    | 13.4(11.0–15.8) | <0.001         |

<sup>△</sup>Paired  $\chi^2$  test is used (McNemar method) to calculate P value.

doi:10.1371/journal.pone.0066233.t003

**Table 4.** OR and 95% CI of CVD for MetS and its individual components.

|                               | 2001 (n = 2334) |                  |                 | 2010 (n = 2102) |                  |                 |
|-------------------------------|-----------------|------------------|-----------------|-----------------|------------------|-----------------|
|                               | CHD (n = 784)   | Stroke (n = 378) | CVD (n = 995)   | CHD (n = 498)   | Stroke (n = 267) | CVD (n = 665)   |
| <b>Model 1</b>                |                 |                  |                 |                 |                  |                 |
| MetS                          | 1.74(1.45–2.09) | 1.51(1.20–1.90)  | 1.73(1.46–2.05) | 1.81(1.45–2.25) | 1.30(0.99–1.70)  | 1.57(1.29–1.90) |
| Individual components of MetS |                 |                  |                 |                 |                  |                 |
| Elevated blood pressure       | 1.81(1.46–2.24) | 1.81(1.35–2.42)  | 1.93(1.59–2.36) | 1.92(1.42–2.59) | 1.88(1.26–2.80)  | 1.89(1.45–2.47) |
| Central obesity               | 1.62(1.32–1.98) | 1.23(0.95–1.58)  | 1.51(1.26–1.80) | 1.52(1.20–1.93) | 1.24(0.92–1.66)  | 1.37(1.11–1.70) |
| Hyperglycemia                 | 1.30(1.09–1.54) | 1.30(1.04–1.62)  | 1.32(1.12–1.56) | 1.33(1.08–1.63) | 1.57(1.20–2.05)  | 1.34(1.11–1.62) |
| Hypertriglyceridemia          | 1.31(1.08–1.59) | 1.09(0.86–1.40)  | 1.19(1.00–1.43) | 1.55(1.26–1.91) | 1.17(0.90–1.52)  | 1.45(1.20–1.75) |
| Low HDL-C                     | 1.13(0.93–1.38) | 1.69(1.32–2.15)  | 1.36(1.13–1.63) | 2.05(1.66–2.52) | 1.36(1.05–1.77)  | 1.86(1.53–2.25) |
| <b>Model 2</b>                |                 |                  |                 |                 |                  |                 |
| MetS                          | 1.67(1.39–1.99) | 1.50(1.19–1.88)  | 1.70(1.43–2.01) | 1.74(1.40–2.17) | 1.25(0.95–1.63)  | 1.52(1.25–1.86) |
| Individual components of MetS |                 |                  |                 |                 |                  |                 |
| Elevated blood pressure       | 1.70(1.37–2.11) | 1.82(1.36–2.44)  | 1.88(1.54–2.29) | 1.83(1.35–2.48) | 1.79(1.20–2.67)  | 1.84(1.10–2.41) |
| Central obesity               | 1.52(1.25–1.86) | 1.21(0.94–1.57)  | 1.48(1.23–1.77) | 1.49(1.18–1.89) | 1.22(0.91–1.63)  | 1.37(1.11–1.70) |
| Hyperglycemia                 | 1.29(1.09–1.54) | 1.30(1.04–1.63)  | 1.32(1.12–1.57) | 1.29(1.05–1.60) | 1.53(1.17–1.99)  | 1.30(1.07–1.57) |
| Hypertriglyceridemia          | 1.30(1.08–1.58) | 1.08(0.84–1.38)  | 1.19(0.99–1.43) | 1.51(1.22–1.85) | 1.13(0.87–1.47)  | 1.42(1.17–1.71) |
| Low HDL-C                     | 1.11(0.91–1.35) | 1.66(1.30–2.12)  | 1.33(1.10–1.60) | 2.00(1.62–2.47) | 1.32(1.01–1.72)  | 1.83(1.51–2.22) |

Model 1: adjusting for gender, age, education, marital status;

Model 2: adjusting for alcohol drinking, smoking, physical exercise, family histories of CVD and the 4 variables in model 1.

doi:10.1371/journal.pone.0066233.t004

and there was no statistically significant difference between participants who completed and those who didn't completed the data. Consequently, the prevalence and changes of MetS can be generalized with confidence to similar population in urban Beijing, China.

Admittedly, this study had several limitations. First, it's a two-rounded cross-sectional study, with about 35% (774 participants) of the population included in both survey times. Compared with a cohort with fix crowd, it could only calculated the prevalence of MetS in two survey years while it can't predict the incidence accurately. But it reflected the real phenomenon in China, where big social change and huge personnel flow were happening every day [21]. To be more complete, we also did a longitudinal study for the 774 participants included in both survey times. The similar results also confirmed the increase change of MetS in China. Secondly, the study only included participants who were aged  $\geq 60$  years and may have different characteristic compared with total population. But on the other hand, this aged population was more susceptible to have MetS and easily to observe the trend happened in China, so as to give us an early alert to MetS and take early prevention actions.

In summary, the present study showed a high and increasing prevalence of MetS in Chinese elderly population living in urban Beijing between 2001 and 2010, especially for dislipidemia

components. These findings indicate that MetS is becoming major public health problems in China. Clearly, without prevention and aggressive treatment of these conditions, the potential socioeconomic and medical burden in China could be overwhelming.

### Supporting Information

**Table S1 Table S1 showed OR and 95% CI of CVD for MetS and its individual components at 2001 and 2010 excluding subjects with diabetes.**

(DOC)

### Acknowledgments

We thank Dr. Y. Jiang, Dr. Q. Chang, Dr. K. Feng and Head Nurse Kang, Head Nurse Wang from PLA general hospital for research assistance in field works.

### Author Contributions

Conceived and designed the experiments: YH XYL. Performed the experiments: YH ML JHW BJ DLS LW. Analyzed the data: ML JHW YH DLS LW SSS YYW. Contributed reagents/materials/analysis tools: ML JHW YH DLS LW SSS YYW. Wrote the paper: ML JHW YH YSS.

### References

- Mottillo S, Filion KB, Genest J, Joseph L, Pilote L, et al. (2010) The metabolic syndrome and cardiovascular risk a systematic review and meta-analysis. *J Am Coll Cardiol* 56: 1113–1132.
- Gami AS, Witt BJ, Howard DE, Erwin PJ, Gami LA, et al. (2007) Metabolic syndrome and risk of incident cardiovascular events and death: a systematic review and meta-analysis of longitudinal studies. *J Am Coll Cardiol* 49: 403–414.
- Galassi A, Reynolds K, He J (2006) Metabolic syndrome and risk of cardiovascular disease: a meta-analysis. *Am J Med* 119: 812–819.
- Ford ES, Li C, Sattar N (2008) Metabolic syndrome and incident diabetes: current state of the evidence. *Diabetes Care* 31: 1898–1904.
- Lorenzo C, Williams K, Gonzalez-Villalpando C, Haffner SM (2005) The prevalence of the metabolic syndrome did not increase in Mexico City between 1990–1992 and 1997–1999 despite more central obesity. *Diabetes Care* 28: 2480–2485.
- Lim S, Shin H, Song JH, Kwak SH, Kang SM, et al. (2011) Increasing prevalence of metabolic syndrome in Korea: the Korean National Health and Nutrition Examination Survey for 1998–2007. *Diabetes Care* 34: 1323–1328.
- Hu G, Lindstrom J, Jousilahti P, Peltonen M, Sjoberg L, et al. (2008) The increasing prevalence of metabolic syndrome among Finnish men and women over a decade. *J Clin Endocrinol Metab* 93: 832–836.

8. Mozumdar A, Liguori G (2011) Persistent increase of prevalence of metabolic syndrome among U.S. adults: NHANES III to NHANES 1999–2006. *Diabetes Care* 34: 216–219.
9. Gu D, Reynolds K, Wu X, Chen J, Duan X, et al. (2005) Prevalence of the metabolic syndrome and overweight among adults in China. *Lancet* 365: 1398–1405.
10. Zhao J, Pang ZC, Zhang L, Gao WG, Wang SJ, et al. (2011) Prevalence of metabolic syndrome in rural and urban Chinese population in Qingdao. *J Endocrinol Invest* 34: 444–448.
11. Villegas R, Xiang YB, Yang G, Cai Q, Fazio S, et al. (2009) Prevalence and determinants of metabolic syndrome according to three definitions in middle-aged Chinese men. *Metab Syndr Relat Disord* 7: 37–45.
12. Cai H, Huang J, Xu G, Yang Z, Liu M, et al. (2012) Prevalence and determinants of metabolic syndrome among women in Chinese rural areas. *PLoS One* 7: e36936.
13. Alberti KG, Eckel RH, Grundy SM, Zimmet PZ, Cleeman JI, et al. (2009) Harmonizing the metabolic syndrome: a joint interim statement of the International Diabetes Federation Task Force on Epidemiology and Prevention; National Heart, Lung, and Blood Institute; American Heart Association; World Heart Federation; International Atherosclerosis Society; and International Association for the Study of Obesity. *Circulation* 120: 1640–1645.
14. He Y, Jiang B, Wang J, Feng K, Chang Q, et al. (2006) Prevalence of the metabolic syndrome and its relation to cardiovascular disease in an elderly Chinese population. *J Am Coll Cardiol* 47: 1588–1594.
15. Wu Z, Yao C, Zhao D, Wu G, Wang W, et al. (2001) Sino-MONICA project: a collaborative study on trends and determinants in cardiovascular diseases in China, Part i: morbidity and mortality monitoring. *Circulation* 103: 462–468.
16. Popkin BM, Horton S, Kim S, Mahal A, Shuigao J (2001) Trends in diet, nutritional status, and diet-related noncommunicable diseases in China and India: the economic costs of the nutrition transition. *Nutr Rev* 59: 379–390.
17. Wang Y, Mi J, Shan XY, Wang QJ, Ge KY (2007) Is China facing an obesity epidemic and the consequences? The trends in obesity and chronic disease in China. *Int J Obes (Lond)* 31: 177–188.
18. Hu FB (2011) Globalization of diabetes: the role of diet, lifestyle, and genes. *Diabetes Care* 34: 1249–1257.
19. He J, Gu D, Reynolds K, Wu X, Muntner P, et al. (2004) Serum total and lipoprotein cholesterol levels and awareness, treatment, and control of hypercholesterolemia in China. *Circulation* 110: 405–411.
20. Mihaylova B, Emberson J, Blackwell L, Keech A, Simes J, et al. (2012) The effects of lowering LDL cholesterol with statin therapy in people at low risk of vascular disease: meta-analysis of individual data from 27 randomised trials. *Lancet* 380: 581–590.
21. Gong P, Liang S, Carlton EJ, Jiang Q, Wu J, et al. (2012) Urbanisation and health in China. *Lancet* 379: 843–852.
